# Supplementary material for: A new aerosol flow reactor to study secondary organic aerosol
Source: Copernicus journal article supplement (doi:10.5194/amt-12-4519-2019), 2019-08-23
Supplement: Supplementary file 1 [file amt-12-4519-2019-supplement.pdf]

Supplement of Atmos. Meas. Tech., 12, 4519–4541, 2019  
<https://doi.org/10.5194/amt-12-4519-2019-supplement>  
© Author(s) 2019. This work is distributed under  
the Creative Commons Attribution 4.0 License.

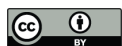

*Supplement of*

## **A new aerosol flow reactor to study secondary organic aerosol**

**Kelly L. Pereira et al.**

*Correspondence to:* Jacqueline Hamilton ([jacqui.hamilton@york.ac.uk](mailto:jacqui.hamilton@york.ac.uk))

The copyright of individual parts of the supplement might differ from the CC BY 4.0 License.

## 1. Instrument calibration

The SIFT-MS was calibrated daily using the manufacturer certified gas standard in accordance with the manufacturer instructions. The O<sub>3</sub> analyser was verified using a 49i-PS dual-cell photometer prior to use. This verification has been adopted by the National Institute of Standards and Technology as the principle technology for the international ozone standard. The  
5 49i-PS photometer is annually calibrated using a certified source. The NO<sub>x</sub> analyser was calibrated using a 1 ppm NO in N<sub>2</sub> standard diluted with zero air (PAG 003 Ecophysics, Switzerland) through a Multigas calibrator (EnviroNics S6100, CT, USA). The NO<sub>2</sub> conversion efficiency was calibrated *via* internal gas phase titration with ozone. The 1 ppm NO standard is provided by the National Physics Laboratory, the Global Atmospheric Watch (GAW) accredited Central Calibration Laboratory for NO<sub>x</sub> and is referenced to the GAW global scale. The ELPI flow rate and particle size distribution were calibrated by the  
10 manufacturer prior to the start of the project. The ELPI electrometer was blank corrected before each experiment, as per manufacturer instructions.

**Table S1** - Number of compounds identified in the ELPI SOA samples using UPLC-UHRMS

| Exp. number <sup>a</sup> | Negative ionisation mode | Positive ionisation mode | Total number of compounds identified <sup>b</sup> |
|--------------------------|--------------------------|--------------------------|---------------------------------------------------|
| 2                        | 33                       | 67                       | 100                                               |
| 3                        | 64                       | 114                      | 178                                               |
| 4                        | 79                       | 122                      | 201                                               |
| 5                        | 61                       | 104                      | 165                                               |
| 8                        | 179                      | 363                      | 542                                               |
| 9                        | 195                      | 488                      | 683                                               |
| 10                       | 220                      | 526                      | 746                                               |
| 11                       | 225                      | 342                      | 567                                               |
| 12                       | 232                      | 406                      | 638                                               |
| 13                       | 239                      | 519                      | 758                                               |
| 17                       | 156                      | 205                      | 361                                               |
| 18                       | 140                      | 211                      | 351                                               |
| 19                       | 133                      | 226                      | 359                                               |
| 20                       | 89                       | 196                      | 285                                               |
| 21                       | 84                       | 256                      | 340                                               |
| 22                       | 99                       | 206                      | 305                                               |
| 23                       | 74                       | 212                      | 286                                               |
| 24                       | 74                       | 207                      | 281                                               |
| 26                       | 143                      | 595                      | 738                                               |
| 27                       | 165                      | 601                      | 766                                               |
| 28                       | 245                      | 665                      | 910                                               |
| 29                       | 157                      | 623                      | 780                                               |
| 30                       | 152                      | 637                      | 789                                               |
| 31                       | 198                      | 677                      | 875                                               |
| 32                       | 166                      | 723                      | 889                                               |
| 34                       | 88                       | 53                       | 141                                               |
| 36                       | 80                       | 44                       | 124                                               |
| 38                       | 116                      | 49                       | 165                                               |

<sup>a</sup>= See Table 1 for experimental descriptions. <sup>b</sup>= The sum of the number of compounds identified in positive and negative ionisation mode.

**Table S2** - Molecular formulae, retention and collection times of the standards used to quantify components in the  $\alpha$ -pinene SOA samples generated from the experiments shown in Table 1.

| Compound Number         | Ionisation mode | UPLC-UHRMS $t_R$ (mins) | MW (g mol <sup>-1</sup> ) | Compound MF                                    | DBE | MF error (ppm) | HPLC-ITMS $t_R$ (mins) | Collection Time (mins) |
|-------------------------|-----------------|-------------------------|---------------------------|------------------------------------------------|-----|----------------|------------------------|------------------------|
| 1                       | +               | 1.27                    | 204.14                    | C <sub>10</sub> H <sub>20</sub> O <sub>4</sub> | 1   | -0.13          | 5.0                    | 4.1 – 5.6              |
| 2                       | +               | 2.98                    | 156.08                    | C <sub>8</sub> H <sub>12</sub> O <sub>3</sub>  | 3   | -0.42          | 11.9                   | 10.9 – 12.5            |
| 3                       | +               | 6.42                    | 170.09                    | C <sub>9</sub> H <sub>14</sub> O <sub>3</sub>  | 3   | 0.13           | 27.3                   | 26.7 – 27.8            |
| 4                       | -               | 7.41                    | 216.10                    | C <sub>10</sub> H <sub>16</sub> O <sub>5</sub> | 3   | 0.67           | 32.3                   | 31.3 – 33.0            |
| 5                       | -               | 6.37                    | 186.20                    | C <sub>9</sub> H <sub>14</sub> O <sub>4</sub>  | 3   | 0.62           | 29.9                   | 29.1 – 30.4            |
| 6                       | +               | 9.72                    | 230.15                    | C <sub>12</sub> H <sub>22</sub> O <sub>4</sub> | 2   | -0.12          | 40.6                   | 39.9 – 41.6            |
| 7                       | +               | 10.07                   | 170.13                    | C <sub>10</sub> H <sub>18</sub> O <sub>2</sub> | 2   | -0.001         | 45.1                   | 44.6 – 45.6            |
| 8                       | +               | 11.56                   | 186.12                    | C <sub>10</sub> H <sub>18</sub> O <sub>3</sub> | 2   | -0.04          | 52.8                   | 52.5 – 53.3            |
| 9                       | +               | 12.96                   | 186.12                    | C <sub>10</sub> H <sub>18</sub> O <sub>3</sub> | 2   | -0.03          | 59.0                   | 58.7 – 59.7            |
| 10                      | +               | 16.55                   | 308.23                    | C <sub>19</sub> H <sub>32</sub> O <sub>3</sub> | 3   | -0.46          | 73.8                   | 73.5 – 74.4            |
| Terebic acid*           | -               | 2.29                    | 158.15                    | C <sub>7</sub> H <sub>10</sub> O <sub>4</sub>  | 3   | 0.56           | -                      | -                      |
| Terpenylic acid*        | -               | 3.08                    | 172.18                    | C <sub>8</sub> H <sub>12</sub> O <sub>4</sub>  | 3   | 0.63           | -                      | -                      |
| 10-hydroxypinonic acid* | -               | 4.47                    | 200.23                    | C <sub>10</sub> H <sub>16</sub> O <sub>4</sub> | 3   | 0.44           | -                      | -                      |
| Norpinic acid*          | -               | 4.99                    | 172.18                    | C <sub>8</sub> H <sub>12</sub> O <sub>4</sub>  | 3   | 0.46           | -                      | -                      |
| Pinic acid**            | -               | 6.37                    | 186.20                    | C <sub>9</sub> H <sub>14</sub> O <sub>4</sub>  | 3   | 0.47           | -                      | -                      |
| Cis-pinonic acid**      | +               | 8.40                    | 184.23                    | C <sub>10</sub> H <sub>16</sub> O <sub>3</sub> | 3   | 0.07           | -                      | -                      |

\* = Standard from Finessi et al. (2014). \*\* = Authentic standard used.

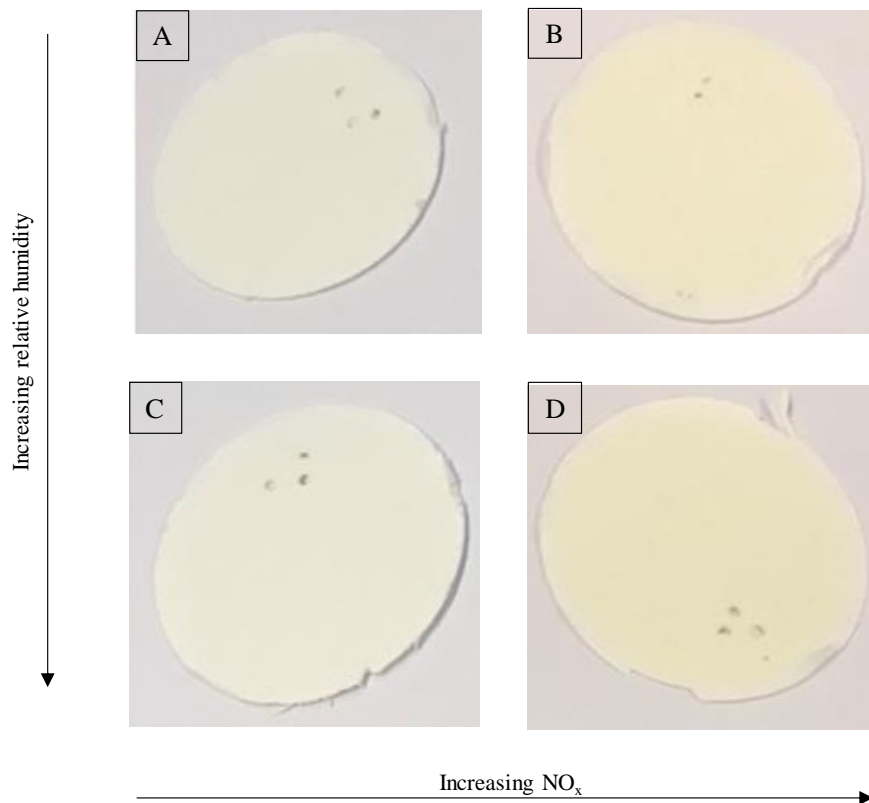

**Figure S1** – SOA filters collected from the photo-oxidation of  $\alpha$ -pinene at 20% (A and B) and 55% (C and D) relative humidity, displaying increasing light absorbing properties with increasing NO<sub>x</sub> (shown as an example). A = no NO<sub>x</sub> (exp. 3, see Table 1). B = VOC/NO<sub>x</sub> ratio of 3 (exp. 13). C = no NO<sub>x</sub> (exp. 5). D = VOC/NO<sub>x</sub> ratio of 3 (exp. 10).

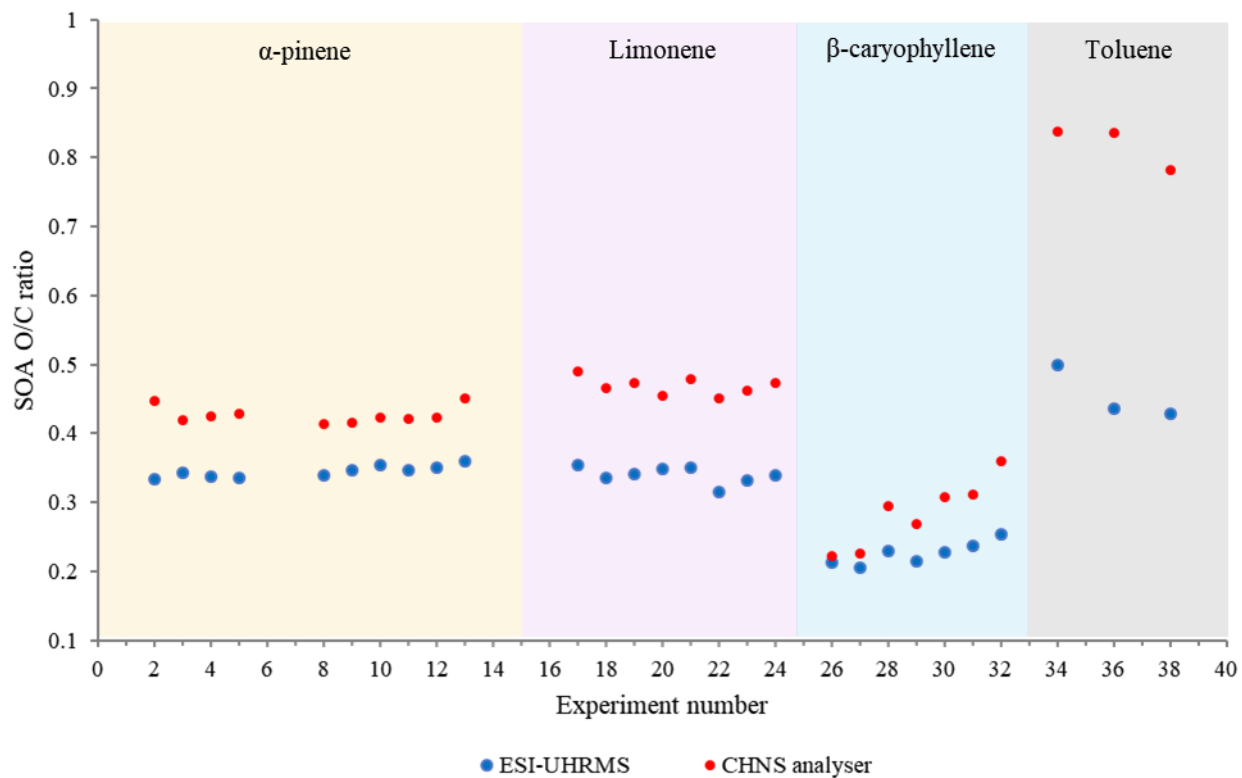

**Figure S2** – Oxygen-to-carbon (O/C) ratio of the generated SOA samples determined from UHRMS and the CHNS elemental analyser. Shaded areas display the SOA samples formed from the photo-oxidation of  $\alpha$ -pinene, limonene,  $\beta$ -caryophyllene and toluene. Experiment numbers correspond to Table 1.

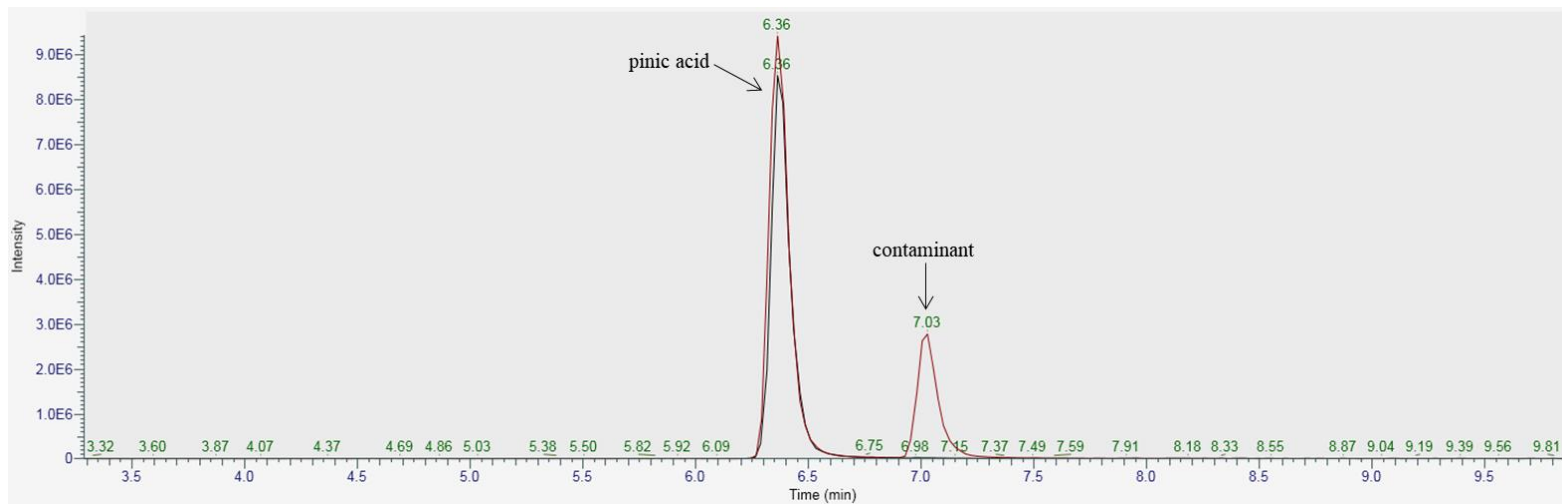

**Figure S3** – A comparison of authentic (red) and generated (black, compound 5, see Table S1) standard of pinic acid at concentration of 1 ppm using UPLC-UHRMS.

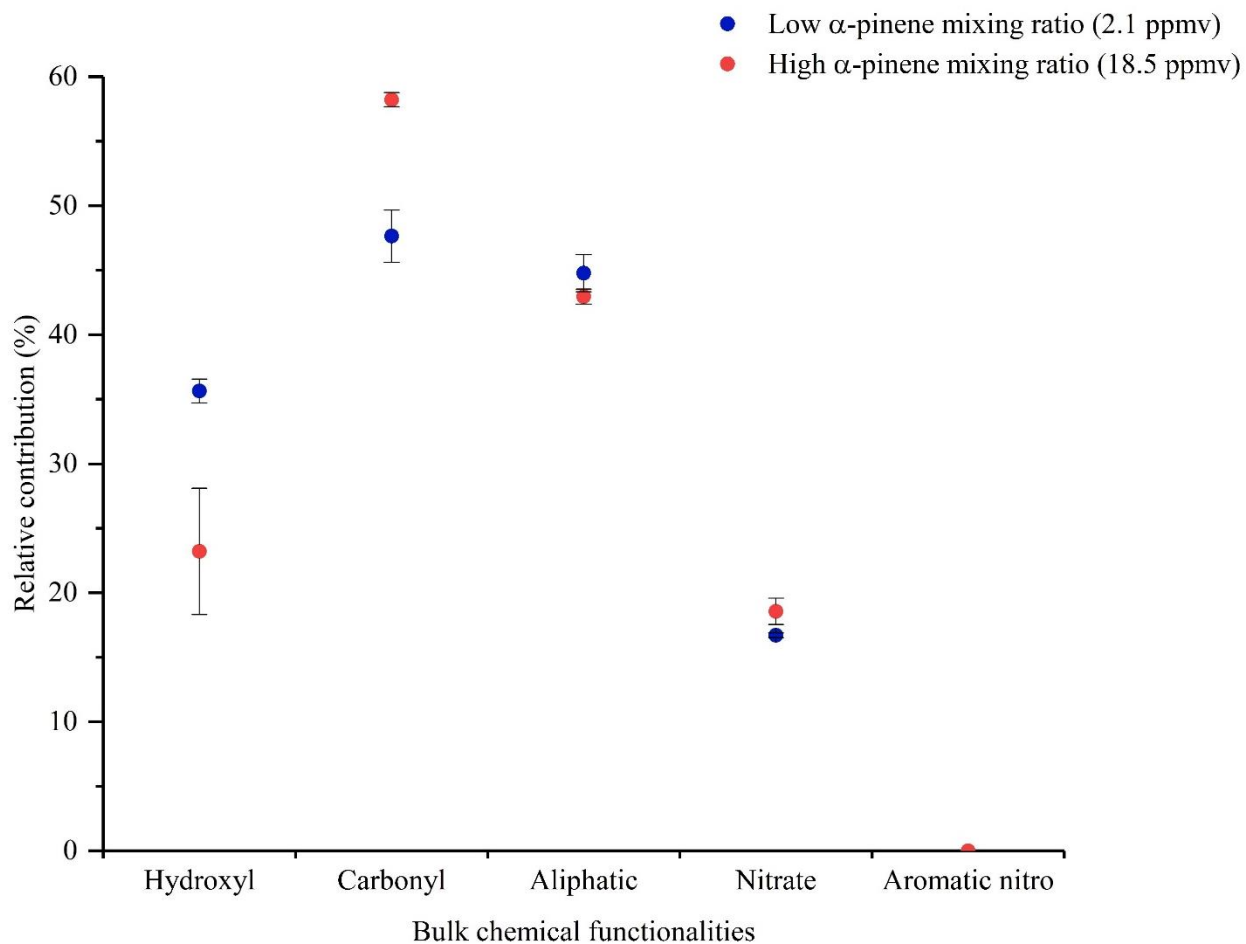

**Figure S4** – A comparison of the bulk SOA chemical functionalities in two SOA samples formed from the photo-oxidation of  $\alpha$ -pinene, with a VOC mixing ratio of 18.5 ppmv (exp. 10, see Table 1) and 2.1 ppmv (exp. 14). Both experiments were performed at a VOC/NO<sub>x</sub> ratio of 3 and a relative humidity of 55%. Data obtained from the ATR-FTIR spectrometer. The peak heights of each chemical functionality have been normalised to the total peak height of all integrated functionalities in each SOA sample, allowing direct comparison between samples.
